RESEARCH ARTICLE

# APP, PSEN1, and PSEN2 mutations in early-onset Alzheimer disease: A genetic screening study of familial and sporadic cases

Hélène-Marie Lanoiselée<sup>1,2</sup>, Gaël Nicolas<sup>3</sup>, David Wallon<sup>1</sup>, Anne Rovelet-Lecrux<sup>3</sup>, Morgane Lacour<sup>1</sup>, Stéphane Rousseau<sup>3</sup>, Anne-Claire Richard<sup>3</sup>, Florence Pasquier<sup>4,5</sup>, Adeline Rollin-Sillaire<sup>4,5</sup>, Olivier Martinaud<sup>1</sup>, Muriel Quillard-Muraine<sup>6</sup>, Vincent de la Sayette<sup>7</sup>, Claire Boutoleau-Bretonniere<sup>8</sup>, Frédérique Etcharry-Bouyx<sup>9</sup>, Valérie Chauviré<sup>9</sup>, Marie Sarazin<sup>10</sup>, Isabelle le Ber<sup>11</sup>, Stéphane Epelbaum<sup>11</sup>, Thérèse Jonveaux<sup>12</sup>, Olivier Rouaud<sup>13</sup>, Mathieu Ceccaldi<sup>14</sup>, Olivier Félician<sup>14</sup>, Olivier Godefroy<sup>15</sup>, Maite Formaglio<sup>16</sup>, Bernard Croisile<sup>16</sup>, Sophie Auriacombe<sup>17</sup>, Ludivine Chamard<sup>18</sup>, Jean-Louis Vincent<sup>19</sup>, Mathilde Sauvée<sup>20</sup>, Cecilia Marelli-Tosi<sup>21</sup>, Audrey Gabelle<sup>21</sup>, Canan Ozsancak<sup>2</sup>, Jérémie Pariente<sup>22</sup>, Claire Paquet<sup>23</sup>, Didier Hannequin<sup>1</sup>, Dominique Campion<sup>3,24\*</sup>, collaborators of the CNR-MAJ project<sup>†</sup>

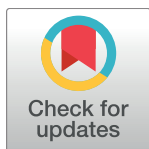

**OPEN ACCESS**

**Citation:** Lanoiselée H-M, Nicolas G, Wallon D, Rovelet-Lecrux A, Lacour M, Rousseau S, et al. (2017) APP, PSEN1, and PSEN2 mutations in early-onset Alzheimer disease: A genetic screening study of familial and sporadic cases. *PLoS Med* 14(3): e1002270. <https://doi.org/10.1371/journal.pmed.1002270>

**Academic Editor:** Bruce L Miller, University of California San Francisco Memory and Aging Center, UNITED STATES

**Received:** September 8, 2016

**Accepted:** February 17, 2017

**Published:** March 28, 2017

**Copyright:** © 2017 Lanoiselée et al. This is an open access article distributed under the terms of the [Creative Commons Attribution License](https://creativecommons.org/licenses/by/4.0/), which permits unrestricted use, distribution, and reproduction in any medium, provided the original author and source are credited.

**Data Availability Statement:** All relevant data are within the paper and its Supporting Information files.

**Funding:** This study was funded by the following grants: Clinical Research Hospital Program from the French Ministry of Health (PHRC, GMAJ 2008/067) to DC; Funding from the French Ministry of Health to the National Reference Centre for Young Alzheimer Disease (CNR-MAJ) to DH; Joint

**1** Normandie Univ, UNIROUEN, Inserm U1245 and Rouen University Hospital, Department of Neurology and CNR-MAJ, Normandy Center for Genomic and Personalized Medicine, Rouen, France, **2** Department of Neurology, Orleans Regional Hospital, Orleans, France, **3** Normandie Univ, UNIROUEN, Inserm U1245 and Rouen University Hospital, Department of Genetics and CNR-MAJ, Normandy Center for Genomic and Personalized Medicine, Rouen, France, **4** Department of Neurology and CNR-MAJ, Lille University Hospital, Lille, France, **5** Inserm UMR-S 1171, Université Lille Nord de France, Lille, France, **6** Biochemistry Laboratory, Rouen University Hospital, Rouen, France, **7** Department of Neurology, Caen University Hospital, Caen, France, **8** Department of Neurology, Nantes University Hospital, Nantes, France, **9** Department of Neurology, Angers University Hospital, Angers, France, **10** Department of Neurology, Saint Anne University Hospital, Paris, France, **11** CNR-MAJ, AP-HP, Hôpital de la Pitié-Salpêtrière, Paris, France; and ICM, Inserm U1127, CNRS UMR 7225, Sorbonne Universités, UPMC-P6 UMR S 1127 - Hôpital Pitié-Salpêtrière, Paris, France, **12** Department of Neurology, Nancy University Hospital, Nancy, France, **13** Department of Neurology, Dijon University Hospital, Dijon, France, **14** Aix Marseille University, Inserm, INS, Institut de Neurosciences des Systèmes, Marseille, France; AP-HM, Service de Neurologie et Neuropsychologie, CHU Timone, Marseille, France, **15** Department of Neurology, Amiens University Hospital Center, Amiens, France, **16** Department of Neurology and CMRR Lyon University Hospital, Lyon, France, **17** Department of Neurology, Bordeaux University Hospital, Bordeaux, France, **18** Department of Neurology, Besançon University Hospital, Besançon, France, **19** Biochemistry Laboratory, Lille University Hospital, Lille, France, **20** Department of Neurology, Grenoble University Hospital, Grenoble, France, **21** Department of Neurology, Montpellier University Hospital, Montpellier, France, **22** Department of Neurology, Toulouse University Hospital, Toulouse, France, **23** CMRR Paris Nord AP-HP, Hôpital Lariboisière, INSERM, U942, Université Paris Diderot, Sorbonne Paris Cité, UMRS 942, Paris, France, **24** Department of Research, Centre Hospitalier du Rouvray, Sotteville-lès-Rouen, France

<sup>†</sup> Membership of the CNR-MAJ project is provided in the Acknowledgments

\* [dominique.campion@univ-rouen.fr](mailto:dominique.campion@univ-rouen.fr)

## Abstract

### Background

*Amyloid protein precursor (APP)*, *presenilin-1 (PSEN1)*, and *presenilin-2 (PSEN2)* mutations cause autosomal dominant forms of early-onset Alzheimer disease (AD-EOAD). Although these genes were identified in the 1990s, variant classification remains a challenge, highlighting the need to colligate mutations from large series.

Program for Neurodegenerative Disease Research from the European Union (JPND PERADES, ANR-13-JPRF-0001-04) to DC. The funders had no role in study design, data collection and analysis, decision to publish, or preparation of the manuscript.

**Competing interests:** The authors have declared that no competing interests exist.

**Abbreviations:** A $\beta$ , amyloid  $\beta$ ; AD, Alzheimer disease; AD-EOAD, autosomal dominant early-onset Alzheimer disease; AOO, age of onset; APOE, *Apolipoprotein E*; APP, *amyloid protein precursor*; CAA, cerebral amyloid angiopathy; CSF, cerebrospinal fluid; EOAD, early-onset Alzheimer disease; ExAC, Exome Aggregation Consortium; LOAD, late-onset Alzheimer disease; PLM, Paris, Lyon, Marseille; *PSEN1*, *presenilin-1*; *PSEN2*, *presenilin-2*; P-Tau, phospho-tau protein; Tau, total tau protein.

## Methods and findings

We report here a novel update (2012–2016) of the genetic screening of the large AD-EOAD series ascertained across 28 French hospitals from 1993 onwards, bringing the total number of families with identified mutations to  $n = 170$ . Families were included when at least two first-degree relatives suffered from early-onset Alzheimer disease (EOAD) with an age of onset (AOO)  $\leq 65$  y in two generations. Furthermore, we also screened 129 sporadic cases of Alzheimer disease with an AOO below age 51 (44% males, mean AOO =  $45 \pm 2$  y). *APP*, *PSEN1*, or *PSEN2* mutations were identified in 53 novel AD-EOAD families. Of the 129 sporadic cases screened, 17 carried a *PSEN1* mutation and 1 carried an *APP* duplication (13%). Parental DNA was available for 10 sporadic mutation carriers, allowing us to show that the mutation had occurred *de novo* in each case. Thirteen mutations (12 in *PSEN1* and 1 in *PSEN2*) identified either in familial or in sporadic cases were previously unreported. Of the 53 mutation carriers with available cerebrospinal fluid (CSF) biomarkers, 46 (87%) had all three CSF biomarkers—total tau protein (Tau), phospho-tau protein (P-Tau), and amyloid  $\beta$  (A $\beta$ )<sub>42</sub>—in abnormal ranges. No mutation carrier had the three biomarkers in normal ranges. One limitation of this study is the absence of functional assessment of the possibly and probably pathogenic variants, which should help their classification.

## Conclusions

Our findings suggest that a nonnegligible fraction of *PSEN1* mutations occurs *de novo*, which is of high importance for genetic counseling, as *PSEN1* mutational screening is currently performed in familial cases only. Among the 90 distinct mutations found in the whole sample of families and isolated cases, definite pathogenicity is currently established for only 77%, emphasizing the need to pursue the effort to classify variants.

### Author summary

#### Why was this study done?

- Mutations in the *amyloid protein precursor* (*APP*), *presenilin-1* (*PSEN1*), and *presenilin-2* (*PSEN2*) genes are a known cause of familial, early-onset Alzheimer disease (EOAD) (onset below age 65).
- However, in order to improve genetic counseling, it is necessary to report mutational screening from large cohorts of patients.

#### What did the researchers do and find?

- In the present study, we performed sequencing of the *APP*, *PSEN1*, and *PSEN2* genes in EOAD families and in 129 sporadic cases.
- Mutations were identified in 170 EOAD families and in 18 sporadic cases.

- In 10 sporadic cases, we showed that the mutation was absent in the parents, indicating that it occurred “de novo.”

### What do these findings mean?

- Sufficient evidence of pathogenicity is reached for 77% of the 90 distinct mutations identified in this sample, allowing their use in genetic counseling.
- Our results suggest a potential benefit to screening nonfamilial Alzheimer disease (AD) cases with onset before 50 y for *APP*, *PSEN1*, and *PSEN2* mutations.

## Introduction

Alzheimer disease (AD) (MIM #104300) is the most common form of dementia. However, early-onset AD (EOAD) constitutes a minority of patients, with an estimated prevalence of 41.2 per 100,000 persons at risk [1]. Among these forms, *presenilin-1* (*PSEN1*) (MIM #104311), *presenilin-2* (*PSEN2*) (MIM #600759) [2–5], and *amyloid protein precursor* (*APP*) (MIM #104760) mutations [6–8] and duplications [9] cause autosomal-dominant EOAD (AD-EOAD), the prevalence of which is estimated to be 5.3 per 100,000 persons at risk [1]. *PSEN1* is the most commonly involved gene, with 221 mutations reported as pathogenic in the Alzheimer forum database ([www.alzforum.org/mutations](http://www.alzforum.org/mutations)). The second most commonly involved gene is *APP*, with 32 pathogenic mutations described, while 19 different *PSEN2* pathogenic mutations have been reported. *APP* encodes the amyloid- $\beta$  precursor protein, the processing of which by the  $\beta$ -secretase and the  $\gamma$ -secretase complex leads to the production of the amyloid  $\beta$  (A $\beta$ ) peptide, a key event in AD pathogenesis. The aggregation of the A $\beta$  peptide in the brain's parenchyma indeed triggers a cascade of events leading to AD. Its aggregation in cerebrovasculature leads to cerebral amyloid angiopathy (CAA), a condition frequently associated with AD and responsible for recurrent haemorrhagic strokes and white matter lesions. *PSEN1* and *PSEN2* encode the presenilins, which constitute the catalytic subunit of the  $\gamma$ -secretase complex (for review, see [10,11]). AD-EOAD causative mutations are thought to be responsible for the increased aggregation of the A $\beta$  peptide in the brain's parenchyma through one of the two following mechanisms: increased overall production of all A $\beta$  species (e.g., *APP* duplications or *APP* mutations located around the  $\beta$  cleavage site) or production of a more aggregation-prone form of the A $\beta$  peptide.

The power to detect genetic variations has dramatically improved over the last few years, but the interpretation of rare variants remains a challenge in a high proportion of cases. The pathogenicity of most *APP*, *PSEN1*, and *PSEN2* variants has not yet been assessed through in vitro functional experiments. In cases of insufficient genetic evidence (i.e., lack or limited familial segregation or recurrence), definite pathogenicity of a given variant may therefore remain uncertain. An algorithm was proposed to classify those variants, based on (i) intrafamilial segregation, (ii) recurrence of the mutation in independent cases and association in case-control samples, (iii) residue conservation between *PSEN1* and *PSEN2* and residue localization on functional domains, and (iv) functional tests, when available [12]. Reporting patients carrying novel as well as previously known mutations along with the associated phenotypes will aid

in classification of these variants and will eventually allow genetic counseling and inclusion in preventive trials for presymptomatic carriers [13].

We had previously described the *PSEN*s and *APP* mutational spectrum in a large French series of families with an EOAD diagnosis in at least two first-degree relatives from two generations [14]. The aim of the present article is to report mutations in additional families included since our last 2012 update [14]. Furthermore, we add the results of the genetic screening of 129 sporadic EOAD patients with an age of onset (AOO) before 51. The involvement of *PSEN1*, *PSEN2*, and *APP* mutations in the genetics of sporadic EOAD has been scarcely studied. In particular, systematic genetic assessments of series of patients with youngest AOO who are at high risk to carry an AD-EOAD mutation were not reported before. In these patients, the family history can remain negative because of a censoring effect (i.e., death of the transmitting parent before EOAD onset) [15] or if the mutation occurs de novo (i.e., if it is not found in parents but occurs in the parental germline or as a postzygotic event) [16].

## Materials and methods

The study was approved by the Paris Ile de France II ethics committee.

### Subjects

EOAD subjects were referred to the National Reference Center for Early-Onset Alzheimer Patients (CNR-MAJ) from 28 university hospitals across France. For each patient, AD diagnosis was established using the National Institute of Aging–Alzheimer’s Association (NIA–AA) criteria [17]. All patients underwent a comprehensive clinical examination, including personal medical and family history and neuropsychological assessment. Search for mutations in *APP*, *PSEN1*, and *PSEN2* genes was performed (i) in AD-EOAD presentations (i.e., if at least two first-degree relatives suffered from EOAD [AOO  $\leq$  65 y]) in two generations or (ii) in sporadic presentations if a patient without family history of AD had an age of onset before 51 y. No other exclusion criteria were applied. Familial cases ( $n = 63$  mutation carriers belonging to 53 families, 42% males, mean AOO =  $48 \pm 5$  y) were included in the 2012–2016 interval, whereas sporadic cases ( $n = 129$ , 44% males, mean AOO =  $45 \pm 2$  y) were included from 1999 onwards. All patients were from European origin with the exception of five patients from African descent: three familial and two sporadic cases. Cerebrospinal fluid (CSF) AD biomarkers were assessed in 65% of the mutation carriers, and neuropathological examination was performed in 3 mutation carriers. A written consent to participate to the study was signed by every patient.

### CSF analysis

CSF samples were obtained using a Sprotte needle in polypropylene collection tubes and aliquoted after centrifugation into polypropylene tubes (catalog number 62.610.201; Sarstedt, Nümbrecht, Germany), then frozen at  $-80^{\circ}\text{C}$  within 1 h.  $\text{A}\beta_{42}$ , Tau, and P-Tau measurements were performed using enzyme-linked immunosorbent assays (ELISA) (Fujirebio Europe N.V., Ghent, Belgium) according to the manufacturer’s instructions. The analysis of all biomarkers was performed in two duplicates and averaged for statistical analyses. Following values were used to define biochemical AD signature:  $\text{A}\beta_{42} < 700$  pg/mL; Tau  $> 350$  pg/mL, and P-Tau  $> 60$  pg/mL. Each subject was classified according to the Paris, Lyon, Marseille (PLM) scale [18]: class 0, corresponding to no pathologic biomarkers; class 1, corresponding to 1/3 pathologic biomarkers; class 2, corresponding to 2/3 pathologic biomarkers; and class 3, with all three biomarkers being pathologic.

## Genetic analyses

Genetic analyses were performed on DNA extracted from whole blood. Exons 2–12 of *PSEN1* (NM\_000021.3), exons 4–13 of *PSEN2* (NM\_000447.2), and exons 16 and 17 of *APP* (NM\_000484.3) were analysed by Sanger sequencing. *APP* duplications and *PSEN1* exon 9/10 deletion were detected using QMPSF (quantitative multiplex PCR of short fluorescent fragments). *APOE* genotype was determined for each subject by Sanger sequencing. Primers are available upon request. Guerreiro's algorithm [12] and Alzforum ([www.alzforum.org/mutations](http://www.alzforum.org/mutations)) database were used to classify each mutation's pathogenicity.

In sporadic cases, when DNA was available for both unaffected parents, parenthood was checked using a package of four microsatellites markers, each with a heterozygosity index from 79 to 88%, and the presence of the mutation identified in the proband was assessed by Sanger sequencing.

## Results

### Update of the EOAD French series

We identified mutations in 53 previously unreported AD-EOAD families and in 18/129 sporadic cases, including 44 *PSEN1*, 2 *PSEN2*, and 20 *APP* mutations as well as five *APP* duplications. The total number of mutation carriers including affected relatives in AD-EOAD families was  $n = 81$  patients (Tables 1–4). Overall, 12 *PSEN1* mutations and 1 *PSEN2* mutation were previously unreported (Tables 1 and 2, in bold). In the next sections, we describe the mutation spectrum, with a particular focus on novel mutations.

**PSEN1.** Five of the 12 novel *PSEN1* mutations were identified in AD-EOAD families: a sister and the mother of the patient carrying the c.251T>C, p.(Met84Thr) mutation were also affected with AD (age at death: 61 and 64 y, respectively); the father of the patient carrying the c.263C>A, p.(Pro88His) mutation died at age 47 with an AD diagnosis; the father of the patient carrying the c.629T>G, p.(Met210Arg) mutation died from AD at age 50, with an AOO of 47 y; the mother and the maternal grandmother of the patient carrying the c.1148T>G, p.(Leu383Trp) mutation died from AD at 54 and 50 y, respectively (AOO was 47 y for both). We also detected in an AD-EOAD family a novel genomic in-frame deletion encompassing *PSEN1* exons 9 and 10: c.(868+1\_869–1)\_(1129+1\_1130–1)del, p.Ser290\_Arg1129delinsTrp, thereafter named  $\Delta 9-10$ , which resulted in a missense change from serine to tryptophan at the aberrant exon 8–11 junction (Table 1). The remaining 7 novel *PSEN1* mutations were found in patients with sporadic EOAD. Among these mutations, a censoring effect was observed in families of patients carrying the c.772T>C, p.(Leu241Arg), the c.539T>A, p.(Ile180Asn), and the c.710T>G, p.(Phe237Cys) substitutions, while the c.331G>T, p.(Gly111Trp), the c.350C>A, p.(Pro117Gln), and the c.614\_616del, p.(Phe205\_Gly206delinsCys) mutations occurred de novo. The seventh patient carried the c.1078G>A p.(Ala360Thr) variant. No censoring effect was noted in his family, but parental DNA was not available to verify the de novo occurrence of the mutation (Table 1). Among carriers of the *PSEN1* mutation, the clinical presentation was mainly isolated progressive cognitive decline, but six patients carrying either the p.(Pro264Leu), p.(Leu173Trp), p.(Gln222His), or the  $\Delta 9-10$  *PSEN1* mutation displayed an associated phenotype of spastic paraparesis. Another patient carrying the *PSEN1* p.(Gly378Glu) substitution also exhibited an atypical presentation: cerebellar ataxia and extra pyramidal syndrome.

**PSEN2.** Only one novel *PSEN2* mutation, c.850A>G, p.(Arg284Gly), and a previously known mutation, p.(Thr122Pro), were identified during this screen (Table 2). No atypical phenotype was noticed.

**Table 1. Previously unreported French families with AD-EOAD and sporadic cases carrying a *PSEN1* mutation.** Novel mutations appear in bold.

| Protein change                           | Nucleotide change                         | Exon | Pathogenicity   | ID fam          | APOE         | AOO (years)    | DD (years)    | Family history | MC (n)    | De novo    |
|------------------------------------------|-------------------------------------------|------|-----------------|-----------------|--------------|----------------|---------------|----------------|-----------|------------|
| p.Ala79Val                               | c.236C>T                                  | 4    | definite        | EXT 85          | E3 E4        | [60–80]        | [7–10]        | F              | 1         |            |
|                                          |                                           |      |                 | ROU 252         | E3 E4        | [63–65]        | [3–12]        | F              | 3         |            |
| <b>p.Met84Thr</b>                        | <b>c.251T&gt;C</b>                        | 4    | <b>definite</b> | <b>EXT 1117</b> | <b>E2 E4</b> | <b>[52–60]</b> | <b>[2–7]</b>  | <b>F</b>       | <b>2</b>  |            |
| <b>p.Pro88His</b>                        | <b>c.263C&gt;A</b>                        | 4    | <b>probable</b> | <b>EXT 890</b>  | <b>E3 E3</b> | <b>[42–45]</b> | <b>[2–5]</b>  | <b>F</b>       | <b>1</b>  |            |
| <b>p.Gly111Trp</b>                       | <b>c.331G&gt;T</b>                        | 4    | <b>probable</b> | <b>EXT 502</b>  | <b>E3 E3</b> | <b>47</b>      | <b>4</b>      | <b>S</b>       | <b>1</b>  | <b>Y</b>   |
| p.Thyr115Cys                             | c.344A>G                                  | 5    | definite        | EXT 755         | E3 E3        | [44–50]        | [3–9]         | F              | 1         |            |
| <b>p.Pro117Gln</b>                       | <b>c.350C&gt;A</b>                        | 5    | <b>probable</b> | <b>EXT 851</b>  | <b>E2 E3</b> | <b>37</b>      | <b>2</b>      | <b>S</b>       | <b>1</b>  | <b>Y</b>   |
| p.Met139Lys*                             | c.416T>A                                  | 5    | probable        | ALZ 034         | E3 E3        | 37             | 10            | S              | 1         | Y          |
| p.Ile143Thr                              | c.428T>C                                  | 5    | definite        | EXT 670         | E3E4         | 35             | 6             | S              | 1         | U          |
| p.Met146Ile                              | c.438G>A                                  | 5    | definite        | EXT 622         | E3 E4        | [42–43]        | [1–7]         | F              | 2         |            |
| p.His163Arg                              | c.488A>G                                  | 6    | definite        | EXT 766         | E3 E4        | [40–46]        | [3–10]        | F              | 1         |            |
|                                          |                                           |      |                 | EXT 1242        | E3 E3        | 34             | 4             | S              | 1         | Y          |
| p.Leu173Trp                              | c.518T>G                                  | 6    | probable        | EXT 149         | E3E3         | 34             | 4             | S              | 1         | Y          |
| <b>p.Ile180Asn</b>                       | <b>c.539T&gt;A</b>                        | 6    | <b>possible</b> | <b>CAE 007</b>  | <b>E4 E4</b> | <b>50</b>      | <b>6</b>      | <b>S</b>       | <b>1</b>  | <b>U</b>   |
| <b>p.Phe205_Gly206 delinsCys</b>         | <b>c.614_616del</b>                       | 7    | <b>probable</b> | <b>EXT 177</b>  | <b>E2 E3</b> | <b>42</b>      | <b>5</b>      | <b>S</b>       | <b>1</b>  | <b>Y</b>   |
| p.Gly206Asp                              | c.617G>A                                  | 7    | definite        | EXT 507         | E3 E3        | [30–32]        | [2–8]         | F              | 1         |            |
| <b>p.Met210Arg</b>                       | <b>c.629T&gt;G</b>                        | 7    | <b>probable</b> | <b>EXT 832</b>  | <b>E3 E3</b> | <b>[47–48]</b> | <b>[3–4]</b>  | <b>F</b>       | <b>1</b>  |            |
| p.Gly217Asp                              | c.650G>A                                  | 7    | definite        | ROU 1551        | E3 E3        | 50             | 5             | S              | 1         | U          |
| p.Gln222His                              | c.666G>C                                  | 7    | definite        | EXT 807         | E2 E3        | 46             | 4             | S              | 1         | U          |
| p.Ala231Thr                              | c.691G>A                                  | 7    | definite        | EXT 680         | E2 E4        | 50             | 3             | S              | 1         | U          |
| p.Met233Thr                              | c.698T>C                                  | 7    | definite        | EXT 1201        | E3 E4        | [44–45]        | [2–4]         | F              | 1         |            |
| p.Met233Ile*                             | c.699G>C                                  | 7    | definite        | MON 001         | E3 E3        | 28             | 8             | S              | 1         | Y          |
| <b>p.Phe237Cys</b>                       | <b>c.710T&gt;G</b>                        | 7    | <b>probable</b> | <b>ROU 128</b>  | <b>E3 E3</b> | <b>25</b>      | <b>14</b>     | <b>S</b>       | <b>1</b>  | <b>U</b>   |
| p.Phe237Leu                              | c.711T>A                                  | 7    | definite        | EXT 1127        | E3 E3        | [47–48]        | [2–4]         | F              | 1         |            |
| <b>p.Leu241Arg</b>                       | <b>c.722T&gt;G</b>                        | 7    | <b>probable</b> | <b>EXT 504</b>  | <b>E3 E3</b> | <b>44</b>      | <b>2</b>      | <b>S</b>       | <b>1</b>  | <b>U</b>   |
| p.Ala246Pro                              | c.736G>C                                  | 7    | definite        | EXT 1194        | E2 E4        | [50–51]        | [1–4]         | F              | 1         |            |
| p.Cys263Phe                              | c.788G>T                                  | 8    | definite        | EXT 1193        | E3 E4        | [48–53]        | [7–8]         | F              | 1         |            |
|                                          |                                           |      |                 | EXT 768         | E3 E4        | [55–65]        | [1–3]         | F              | 1         |            |
| p.Pro264Leu                              | c.791C>T                                  | 8    | definite        | EXT 966         | E3 E3        | 50             | 6             | F              | 1         |            |
|                                          |                                           |      |                 | EXT 1010        | E3 E3        | [55–65]        | [4–5]         | F              | 1         |            |
|                                          |                                           |      |                 | EXT 384         | E3 E3        | [52–60]        | [4–8]         | F              | 1         |            |
|                                          |                                           |      |                 | EXT 408         | E3 E4        | [41–55]        | [13–16]       | F              | 1         |            |
|                                          |                                           |      |                 | EXT 392         | E3 E3        | [50–58]        | [4–11]        | F              | 1         |            |
| p.Arg269His                              | c.806G>A                                  | 8    | definite        | EXT 1228        | E3E3         | 60             | [4–15]        | F              | 1         |            |
| p.Glu273Gly                              | c.818A>G                                  | 8    | definite        | EXT 886         | E3 E4        | [46–53]        | [4–7]         | F              | 1         |            |
|                                          |                                           |      |                 | EXT 1195        | E3 E4        | [44–54]        | [3–5]         | F              | 1         |            |
| <b>p.Ala360Thr</b>                       | <b>c.1078G&gt;A</b>                       | 10   | <b>possible</b> | <b>SAL 629</b>  | <b>E3 E3</b> | <b>45</b>      | <b>4</b>      | <b>S</b>       | <b>1</b>  | <b>U</b>   |
| p.Gly378Glu                              | c.1133G>A                                 | 11   | probable        | EXT 390         | E3 E3        | [38–44]        | [6–9]         | F              | 1         |            |
| p.Gly378Val                              | c.1133G>T                                 | 11   | definite        | EXT 596         | E3 E3        | [48–53]        | [2–4]         | F              | 2         |            |
| <b>p.Leu383Trp</b>                       | <b>c.1148T&gt;G</b>                       | 11   | <b>probable</b> | <b>EXT 1071</b> | <b>E3 E3</b> | <b>[47–57]</b> | <b>[4–7]</b>  | <b>F</b>       | <b>1</b>  |            |
| p.Val391Phe                              | c.1171G>T                                 | 11   | definite        | EXT 902         | E3 E3        | [40–47]        | [1–5]         | F              | 2         |            |
| p.Leu418Phe                              | c.1254G>C                                 | 12   | definite        | ROU 1306        | E3 E3        | 33             | 8             | S              | 1         | Y          |
| p.Ser290_Ser319delinsCys (Δ 9)*          | c.869-2A>G                                | 9    | definite        | EXT 235         | E2 E3        | 46             | 6             | S              | 1         | Y          |
| <b>p.Ser290_Arg377delinsTrp (Δ 9–10)</b> | <b>c.(868+1_8691)_ (1129+1_1130–1)del</b> | 9 10 | <b>probable</b> | <b>EXT 313</b>  | <b>E2 E4</b> | <b>[55–56]</b> | <b>[5–6]</b>  | <b>F</b>       | <b>1</b>  |            |
| <b>Total and ranges:</b>                 |                                           |      |                 | <b>44</b>       |              | <b>[25–80]</b> | <b>[1–16]</b> | <b>27 F</b>    | <b>49</b> | <b>9 Y</b> |
|                                          |                                           |      |                 |                 |              |                |               | <b>17 S</b>    |           | <b>8 U</b> |

ID fam, family code; MC, number of mutations carriers in the family; AOO, age of onset ranges in the family; DD, disease duration (at death or last examination); APOE, Apolipoprotein E genotype; F, familial; S, sporadic; Y, yes, U, unknown.

\* Indicates a previously reported de novo mutation in a sporadic case [20, 21, 40].

<https://doi.org/10.1371/journal.pmed.1002270.t001>



**Table 2. Previously unreported French families with AD-EOAD carrying a *PSEN2* mutation.** Novel mutations appear in bold.

| Protein change           | Nucleotide change  | Exon     | Pathogenicity   | APOE         | ID fam         | AOO (years)    | DD (years)   | Family history | MC (n)   |
|--------------------------|--------------------|----------|-----------------|--------------|----------------|----------------|--------------|----------------|----------|
| p.Thr122Pro              | c.364A>C           | 6        | probable        | E3 E4        | EXT 441        | [45–47]        | [2–7]        | F              | 1        |
| <b>p.Arg284Gly</b>       | <b>c.850A&gt;G</b> | <b>9</b> | <b>possible</b> | <b>E3 E4</b> | <b>GRE 004</b> | <b>57</b>      | <b>6</b>     | <b>F</b>       | <b>1</b> |
| <b>Total and ranges:</b> |                    |          |                 |              | <b>2</b>       | <b>[45–57]</b> | <b>[2–7]</b> | <b>2 F</b>     | <b>2</b> |

ID fam, family code; MC, number of mutations carriers in the family; AOO, age of onset ranges in the family; DD, disease duration (at death or last examination); APOE, Apolipoprotein E genotype; F, familial; S, sporadic.

<https://doi.org/10.1371/journal.pmed.1002270.t002>

**Table 3. Previously unreported French families with AD-EOAD carrying an *APP* mutation.**

| Protein change           | Nucleotide change | Exon | Pathogenicity | APOE  | ID fam    | AOO (years)    | DD (years)    | Family history | MC (n)    |
|--------------------------|-------------------|------|---------------|-------|-----------|----------------|---------------|----------------|-----------|
| p.Ala713Thr              | c.2137G>A         | 17   | definite      | E3 E3 | EXT 1064  | 50             | 3             | F              | 1         |
|                          |                   |      |               | E2 E3 | EXT 551   | [62–64]        | [2–3]         | F              | 2         |
|                          |                   |      |               | E3 E3 | ROU 1580  | 56             | 4             | F              | 1         |
|                          |                   |      |               | E3 E3 | EXT 1059  | [61–66]        | [4–9]         | F              | 1         |
|                          |                   |      |               | E3 E4 | ROU 1562  | [50–85]        | [5–9]         | F              | 2         |
| p.Val717Ile "London"     | c.2149G>A         | 17   | definite      | E3 E3 | ALZ 620   | [50–52]        | [2–8]         | F              | 1         |
|                          |                   |      |               | E3 E3 | ALZ 568   | [50–53]        | [4–15]        | F              | 1         |
|                          |                   |      |               | E3 E4 | EXT 1055  | [45–50]        | [3–4]         | F              | 1         |
|                          |                   |      |               | E3 E4 | EXT 1044  | [48–55]        | [2–6]         | F              | 1         |
|                          |                   |      |               | E3 E4 | EXT 1017  | [40–50]        | [2–4]         | F              | 1         |
|                          |                   |      |               | E3 E3 | EXT 1015  | [48–60]        | [3–5]         | F              | 1         |
|                          |                   |      |               | E3 E4 | EXT 993   | [40–50]        | [4–13]        | F              | 1         |
|                          |                   |      |               | E3 E3 | EXT 599   | [39–61]        | [3–9]         | F              | 1         |
|                          |                   |      |               | E3 E3 | EXT 519   | [56–65]        | [4–7]         | F              | 1         |
|                          |                   |      |               | E3 E3 | EXT 397   | [50–56]        | [4–10]        | F              | 2         |
|                          |                   |      |               | E3 E3 | SAL 638   | [45–54]        | [3–4]         | F              | 1         |
| p.Lys724Asn "Belgian"    | c.2172G>C         | 17   | definite      | E3 E3 | EXT 624   | [55–65]        | [7–14]        | F              | 1         |
| p.Asp694Asn "Iowa"       | c.2080G>A         | 17   | definite      | E3 E3 | EXT 233   | [51–56]        | [1–11]        | F              | 2         |
| p.Glu693Lys "Italian"    | c.2077G>A         | 17   | definite      | E3 E3 | EXT414    | [60–63]        | 5             | F              | 2         |
| p.Ala692Gly "Flemish"    | c.2075C>G         | 17   | definite      | E3 E3 | EXT 1025  | [45–51]        | [2–9]         | F              | 1         |
| <b>Total and ranges:</b> |                   |      |               |       | <b>20</b> | <b>[39–85]</b> | <b>[1–15]</b> | <b>20 F</b>    | <b>25</b> |

ID fam, family code; MC, number of mutations carriers in the family; AOO, age of onset ranges in the family; DD, disease duration (at death or last examination); APOE, Apolipoprotein E genotype; F, familial; S, sporadic.

<https://doi.org/10.1371/journal.pmed.1002270.t003>

**Table 4. Previously unreported French families with AD-EOAD and sporadic cases carrying an *APP* duplication.**

| Protein change           | Duplication size (Mb) | APOE  | ID fam   | AOO (years)    | DD (years)    | MC (n)   | Family history | De Novo |
|--------------------------|-----------------------|-------|----------|----------------|---------------|----------|----------------|---------|
| DUP APP                  | 2.2                   | E3 E3 | EXT 1093 | [53–65]        | [6–9]         | 1        | F              |         |
| DUP APP                  | 1.4                   | E3 E4 | EXT 857  | [56–62]        | [2–6]         | 1        | F              |         |
| DUP APP                  | 5.9                   | E3 E3 | EXT 814  | [50–54]        | [8–10]        | 1        | F              |         |
| DUP APP                  | 1.4                   | E3 E3 | EXT 1252 | [54–58]        | 2             | 1        | F              |         |
| DUP APP*                 | 7.6                   | E3 E3 | EXT 773  | 44             | 12            | 1        | S              | Y       |
| <b>Total and ranges:</b> |                       |       | <b>5</b> | <b>[44–65]</b> | <b>[2–12]</b> | <b>5</b> | <b>4F 1S</b>   |         |

ID fam, family code; MC, number of mutations carriers in the family; AOO, age of onset ranges in the family; DD, disease duration (at death or last examination); APOE, Apolipoprotein E genotype; F, familial; S, sporadic.

\* Indicates a previously reported de novo mutation in a sporadic case [20].

<https://doi.org/10.1371/journal.pmed.1002270.t004>

**APP.** In the *APP* gene, no novel mutation was found. We identified a previously reported mutation in 25 patients from 20 AD-EOAD families (Table 3). The most frequent one was the c.2149G>A, p.(Val717Ile) substitution, which was present in 12 subjects from 11 families. Clinical features were typical of AD with amnesic presentation. The c.2137G>A, p.(Ala713Thr) mutation was found in 7 patients from 5 unrelated families. They exhibited a progressive cognitive decline starting from age 50 to 66 y. Notably, the mother of a patient who carried the mutation together with an *APOE* 4–4 genotype had no cognitive impairment until the age of 85, when she presented recurrent lobar hematoma. In addition, 5 subjects from 3 families carried mutations located within the coding sequence of the A $\beta$  peptide: one carried the “Flemish” *APP* mutation c.2075C>G, p.(Ala692Gly), two carried the “Italian” mutation c.2077G>A, p.(Glu693Lys), and another two carried the “Iowa” mutation c.2080G>A, p.(Asp694Asn). A complete description of the phenotype of these 5 patients is provided in Sellal et al. [19].

**APP duplications.** Four subjects in four distinct AD-EOAD families and a sporadic case carried an *APP* duplication (Table 4). All patients exhibited progressive cognitive impairment. Only one presented signs of CAA and suffered from intracerebral hematoma at the age of 60.

**CSF biomarkers.** CSF biomarkers were available for 53 out of 81 mutation carriers (65%) (Table 5). There was no significant difference in A $\beta$ <sub>42</sub>, Tau, and P-Tau mean values between patients bearing *PSEN1* and *APP* mutations or duplications (two groups, *p*-values = 0.78, 0.19, and 0.16, respectively, Mann–Whitney U test). Among the 53 patients, 46 (87%) were classified PLM 3, 5 (9%) were classified PLM 2, and 2 (4%) were classified PLM 1; no patient was classified PLM 0. Among the 5 patients classified PLM 2, 2 had low A $\beta$ <sub>42</sub> and elevated Tau levels, and 3 had elevated Tau and P-Tau with normal A $\beta$ <sub>42</sub> CSF level. Two of the latter 3 patients carried a *PSEN1* mutation: 1 carried the p.(Leu383Trp) with AOO at 57 y and 4 y of evolution, and the other carried the p.(Ala231Thr) with AOO at 50 y and 3 y of evolution. The third one carried an *APP* p.(Val717Ile) mutation with an AOO at 56 y and 4 y of evolution. The two patients classified PLM 1 had low A $\beta$ <sub>42</sub> value, without Tau or P-Tau elevation. One carried a p.(Ala360Thr) *PSEN1* mutation with AOO at 45 y and 3 y of evolution; the second carried a p.(Ala692Gly) *APP* mutation with AOO at 45 y and 2 y of evolution.

**Neuropathology.** Neuropathological examination was available for three subjects. For patient EXT 773, who carried an *APP* duplication, the diagnosis was definite AD with Braak stage VI, Thal stage V. There was amyloid deposition in vessel walls in the insula and basal ganglia. Signs of severe CAA were found in middle frontal gyrus, superior temporal gyrus, inferior parietal cortex, and primary motor area. Lewy bodies were found in the amygdala, locus niger, nucleus basalis of Meynert, and entorhinal cortex.

For patient EXT 149, who carried the c.518T>G, p.Leu173Trp de novo *PSEN1* mutation, rare senile plaques associated with numerous cotton wool deposits and neurofibrillary tangles were present in hippocampal regions and cortical areas. Lewy bodies were found in the amygdala and limbic cortex as well as the frontal, temporal, and parietal cortices and cingulum. CAA was noted in hippocampal regions, the temporal lobe, and the cerebellum.

For patient EXT 1117, who carried the c.251T>C, p.Met84Thr *PSEN1* mutation, neuropathological examination showed global atrophy, particularly in temporal lobes. Samples from the cerebellum and the frontal, temporal, and parietal cortices showed numerous senile plaques and neurofibrillary tangles associated with severe CAA. No Lewy bodies were observed.

## Mutational spectrum in the whole French EOAD series

Adding this sample to our previous reports [1,8,9,14,15,19,21–24], a total of 170 AD-EOAD families and 18 sporadic cases carrying mutations in genes known to cause EOAD have now



**Table 5. CSF biomarkers levels in mutation carriers (pg/mL).**

| Gene         | Mutation                       | ID               | Aβ <sub>42</sub> | Tau    | p-Tau | PLM |
|--------------|--------------------------------|------------------|------------------|--------|-------|-----|
| <i>PSEN1</i> | p.Ala79Val                     | EXT 85           | 494              | >1,200 | 206   | 3   |
| <i>PSEN1</i> | p.Thyr115Cys                   | EXT 755          | 622              | 207    | 68    | 3   |
| <i>PSEN1</i> | p.Pro117Gln                    | EXT 851          | 587              | >1,200 | 173   | 3   |
| <i>PSEN1</i> | p.Ile143Thr                    | EXT 670          | 393              | >1,200 | 84    | 3   |
| <i>PSEN1</i> | p.Met146Ile                    | EXT 622          | 543              | 857    | 105   | 3   |
| <i>PSEN1</i> | p.His163Arg                    | EXT 1242         | 615              | >1,200 | 129   | 3   |
| <i>PSEN1</i> | p.His163Arg                    | EXT 766          | 434              | 849    | 66    | 3   |
| <i>PSEN1</i> | p.Phe205_Gly206 delinsCys      | EXT 177          | 376              | 397    | 91    | 3   |
| <i>PSEN1</i> | p.Met210Arg                    | EXT 832          | 235              | 672    | 104   | 3   |
| <i>PSEN1</i> | p.Gln222His                    | EXT 807          | 502              | 1,000  | 132   | 3   |
| <i>PSEN1</i> | p.Ala231Thr                    | EXT 680          | 772              | 1,028  | 113   | 2   |
| <i>PSEN1</i> | p.Met233Thr                    | EXT 1201         | 440              | 692    | 107   | 3   |
| <i>PSEN1</i> | p.Phe237Leu                    | EXT 1127         | 430              | >1,200 | 142   | 3   |
| <i>PSEN1</i> | p.Leu241Arg                    | EXT 504          | 464              | 595    | 94    | 3   |
| <i>PSEN1</i> | p.Ala246Pro                    | EXT 1194         | 470              | 523    | 80    | 3   |
| <i>PSEN1</i> | p.Cys263Phe                    | EXT 1193         | 561              | 993    | 121   | 3   |
| <i>PSEN1</i> | p.Cys263Phe                    | EXT 768          | 454              | 368    | 66    | 3   |
| <i>PSEN1</i> | p.Pro264Leu                    | EXT 966          | 543              | 731    | 92    | 3   |
| <i>PSEN1</i> | p.Pro264Leu                    | EXT 1010         | 445              | 696    | 92    | 3   |
| <i>PSEN1</i> | p.Arg269His                    | EXT 1228         | 231              | 558    | 111   | 3   |
| <i>PSEN1</i> | p.Glu273Gly                    | EXT 886          | 541              | >1,200 | 165   | 3   |
| <i>PSEN1</i> | P.Glu273Gly                    | EXT 1195         | 643              | 767    | 104   | 3   |
| <i>PSEN1</i> | p.Ala360Thr                    | SAL 629          | 487              | 217    | 35    | 1   |
| <i>PSEN1</i> | p.Gly378Glu                    | EXT 390          | 515              | 545    | 79    | 3   |
| <i>PSEN1</i> | p.Gly378Val                    | EXT 596 ind. 001 | 288              | 522    | 86    | 3   |
| <i>PSEN1</i> | p.Gly378Val                    | EXT 596 ind. 002 | 464              | 517    | 79    | 3   |
| <i>PSEN1</i> | p.Leu383Trp                    | EXT 1071         | 745              | 1,140  | 130   | 2   |
| <i>PSEN1</i> | p.Val391Phe                    | EXT 902 ind. 001 | 279              | 782    | 129   | 3   |
| <i>PSEN1</i> | p.Val391Phe                    | EXT 902 ind. 002 | 545              | 495    | 41    | 2   |
| <i>PSEN1</i> | p.Ser290_Ser319delinsCys (Δ 9) | EXT 235          | 481              | 777    | 56    | 2   |
| <i>PSEN1</i> | Δ exon 9–10                    | EXT 313          | 153              | 414    | 64    | 3   |
| <i>APP</i>   | p.Ala713Thr                    | EXT 1064         | 344              | >1,200 | 191   | 3   |
| <i>APP</i>   | p.Ala713Thr                    | ROU 1580         | 605              | >1,200 | 229   | 3   |
| <i>APP</i>   | p.Ala713Thr                    | EXT 551          | 150              | >1,200 | 150   | 3   |
| <i>APP</i>   | p.Ala713Thr                    | EXT 1059         | 246              | >1,200 | 212   | 3   |
| <i>APP</i>   | p.Ala713Thr                    | ROU 1562         | 287              | 1,198  | 156   | 3   |
| <i>APP</i>   | p.Val717Ile                    | ALZ 568          | 252              | 809    | 118   | 3   |
| <i>APP</i>   | p.Val717Ile                    | EXT 1055         | 545              | 533    | 69    | 3   |
| <i>APP</i>   | p.Val717Ile                    | EXT 1044         | 603              | 841    | 102   | 3   |
| <i>APP</i>   | p.Val717Ile                    | EXT 1017         | 595              | 974    | 101   | 3   |
| <i>APP</i>   | p.Val717Ile                    | EXT 1015         | 663              | >1,200 | 357   | 3   |
| <i>APP</i>   | p.Val717Ile                    | EXT 993          | 255              | 573    | 91    | 3   |
| <i>APP</i>   | p.Val717Ile                    | EXT 519          | 595              | 1,008  | 94    | 3   |
| <i>APP</i>   | p.Val717Ile                    | EXT 397          | 801              | 841    | 112   | 2   |
| <i>APP</i>   | p.Val717Ile                    | SAL 638          | 536              | 732    | 132   | 3   |
| <i>APP</i>   | p.Lys724Asn                    | EXT 624          | 427              | 720    | 74    | 3   |
| <i>APP</i>   | p.Asp694Asn                    | EXT 233          | 316              | >1,200 | 203   | 3   |

(Continued)

Table 5. (Continued)

| Gene | Mutation    | ID       | A $\beta$ <sub>42</sub> | Tau          | p-Tau      | PLM      |
|------|-------------|----------|-------------------------|--------------|------------|----------|
| APP  | p.Glu693Lys | EXT 414  | <b>334</b>              | <b>422</b>   | <b>77</b>  | <b>3</b> |
| APP  | p.Ala692Gly | EXT 1025 | <b>594</b>              | 226          | 45         | 1        |
| APP  | Duplication | EXT 857  | <b>485</b>              | <b>485</b>   | <b>67</b>  | <b>3</b> |
| APP  | Duplication | EXT 814  | <b>484</b>              | <b>721</b>   | <b>70</b>  | <b>3</b> |
| APP  | Duplication | EXT 1093 | <b>311</b>              | <b>808</b>   | <b>93</b>  | <b>3</b> |
| APP  | Duplication | EXT 1252 | <b>519</b>              | <b>1,215</b> | <b>202</b> | <b>3</b> |

ID, family code; ind, individual code. Abnormal values appear in bold.

>1,200: CSF Tau values higher than 1,200 but not diluted for a second dosage by the local center.

<https://doi.org/10.1371/journal.pmed.1002270.t005>

been identified by our national reference center. Ninety distinct mutations (78 *PSEN1*, 4 *PSEN2*, and 8 *APP*, including *APP* duplication) were represented by respectively 127, 9, 34, and 18 occurrences in this whole sample (S1 Table). For each distinct mutation, the frequency reported in the Exome Aggregation Consortium (ExAC) database [25], which colligates human exome data from ~60,000 individuals, is null or very low (S1 Table).

The mean AOO for *PSEN1* mutation carriers was 44.4 y (range 24–80), 53.9 y (range 45–69) for *PSEN2* mutation carriers, 50.9 y (range 39–85) for *APP* mutation carriers, and 51.1 y (range 41–69) for patients carrying *APP* duplications. Variation of AOO by mutated gene was similar to the one reported by Ryman et al. (2014) [26].

### Sporadic cases and de novo mutations

Among the 129 patients with a sporadic presentation and an AOO before 51 y for whom a mutation screening was performed, we identified 18 mutations, including 17 *PSEN1* mutations and 1 *APP* duplication (Tables 1 and 4). For 10 patients, DNA of the unaffected parents was available, and analysis of parental DNA showed that the 10 mutations had occurred de novo: 7 patients carried a de novo *PSEN1* missense mutation, 1 carried a de novo splicing *PSEN1* mutation, 1 carried a de novo *PSEN1* indel, and another 1 carried an *APP* de novo duplication. Interestingly, 5 out of 7 missense de novo *PSEN1* mutations occurred at a position already known to be hit by pathogenic mutations. Parental DNA was not available for the remaining *PSEN1* mutation carriers, but we noted a strong censoring effect due to a young age at death in two families, and the parents were unknown in three other families. For the remaining 3 patients, the absence of both a censoring effect and AD history in the parents is suggestive of a de novo occurrence, but this could not be proved by parental DNA analysis.

### Discussion

We have studied two samples of EOAD patients and identified 10 novel missense mutations, 1 novel indel, and 1 novel genomic deletion in *PSEN1* and 1 novel missense mutation in *PSEN2*. According to the Guerreiro’s algorithm [12], pathogenicity was considered as definite for 1 mutation, probable for 9, and possible for 3. Considering the whole French EOAD series, 90 distinct mutations (including the *APP* duplication) are now reported, and pathogenicity is considered definite for 69 mutations (77%), probable for 16 (18%), and possible for 3 (5%).

The pathological effect of three known mutations deserves discussion because of incomplete penetrance, nonpathogenicity, or wide range of AOO.

The *PSEN1* c.236C>T, p.(Ala79Val) substitution is currently considered pathogenic and leads to an increase in A $\beta$ <sub>42</sub> level and A $\beta$ <sub>42</sub>/A $\beta$ <sub>40</sub> ratios in cell cultures [27]. However, this

variant seems to be associated with a later onset compared to the other *PSEN1* variants. It was found in several families with late-onset AD (LOAD) [26,28,29]. Four mutation carriers from one family had a definite, neuropathological diagnosis of AD and an AOO after 75 y [28]. Of note, this variant has been reported once in the ExAC database [25] (among ~60,000 controls). Considering that it was also found in subjects with EOAD [30,31], these data suggest that this mutation is associated with a large range of AOO (53–78 y), which could lead to underestimation of its frequency and is of importance for genetic counseling.

Second, the *PSEN2* c.211T>C, p.(Arg71Trp) variant was initially found in patients with LOAD [12,32,33]. We previously reported this variant in two EOAD families [14], but we removed it from our complete list because it is now considered as nonpathogenic. It did not segregate with AD in several families [32], including 8/14 affected individuals not carrying this variant in one large family [29]. It was found with an allele frequency of 0.034% (1.95% in the Finnish population) in the ExAC database. When coexpressed in HEK293 cells with *APP*, the variant did not alter the  $A\beta_{42}/A\beta_{40}$  ratio in vitro [34]. As previously discussed, these elements lead us to consider this mutation as nonpathogenic [15].

Third, since our first report in a patient with sporadic probable AD [8], the *APP* c.2137 G>A p.(Ala713Thr) mutation has now been found in 24 patients from 11 families [5,35–39], including the 6 patients from 5 families included here. Although cerebrovascular lesions were described in brain imaging of some of these patients [36–38], the clinical presentation was a progressive cognitive decline in all but one of the reported cases. Interestingly, AOO ranged from 49 to 85 y, and several asymptomatic carriers were also reported, including one 88-y-old woman [8]. In one family, the mutation was found homozygous in 3 patients [38], and the disease onset was not different from the heterozygous carriers. In the present report, the mother of the proband ROU-1562 had no cognitive impairment until the age of 85, when a diagnosis of probable CAA was made. Of note, this variant has been reported with an allele frequency of 0.0058% in the ExAC database. Taken together, this suggests that the p.Ala713Thr substitution is a pathological variant with reduced penetrance, which is unusual compared to other *APP* mutations and is of main consequence for genetic counseling.

A notable finding of this study, as compared with the state of the literature, is the number ( $n = 10$ ) of de novo *PSEN1* or *APP* mutations detected in this set of 129 sporadic cases with onset below age 51. Furthermore, this could be underestimated, as parental DNA was not available for all cases. To our knowledge, only four de novo mutations had previously been reported in *APP* or *PSEN1*, including three by our group [20,22,23,40]. To our knowledge, there is no evidence to suggest that the *PSEN1* gene is a hot spot of de novo mutations. Following the estimations by Samocha and coauthors [41] provided on the ExAC database [25], the probability to observe a *PSEN1* de novo missense mutation in an individual is  $1.29 \times 10^{-5}$ . This probability is that of an average gene since 56% of genes are more mutable and 44% less mutable than *PSEN1*. Thus, the discrepancy between the low number of previously reported de novo *PSEN1* mutations in sporadic EOAD patients and the present report is likely to reflect a lack of inclusion of these patients in previous mutational screenings, which focused on familial cases. This underscores the need to systematically include patients with sporadic presentation and very early AOO in genetic screening. Consequences for genetic counseling are important, as the offspring of a mutation carrier has a same 50% risk to be a mutation carrier regardless of the familial or sporadic presentation of the affected parent; the offspring can then (i) be accurately informed, (ii) ask for a presymptomatic testing, and (iii) be a possible candidate for preventive clinical trials [13].

Concerning CSF biomarkers, 48/53 (91%) of patients with available CSF exhibit signs of both  $A\beta$  and Tau pathology, and 87% of the mutation carriers were classified PLM 3. This is higher than the 76% reported in our previous series [14]. This difference can be explained by

the change in the A $\beta$ <sub>42</sub> cutoff (<700 versus <500 pg/ml in our previous series) according to the 2013 recommendations of the PLM network, whose aim is to homogenize preanalytical treatment for CSF biomarkers across French centers [42]. Overall, no AD mutation carrier presented with normal CSF biomarkers, suggesting that when all three CSF biomarkers are in normal ranges, genes involved in other neurodegenerative diseases should be screened in the first instance.

Our primary goal was to provide to clinicians a list of variants that can accurately be used in genetic counseling. Considering our whole series, this goal is achieved for 60/78 (77%) of *PSEN1*, 1/4 of *PSEN2*, and 8/8 of *APP* mutations reported in the French population. However, despite a large effort, too many mutations in AD-EOAD genes remain insufficiently characterized, and some are incompletely penetrant. The recent analysis of ~60,000 human exomes by the ExAC consortium has revealed an implausibly high per-individual burden of variants reported as causing disease in databases listing Mendelian disease alleles. These findings cast doubt on the validity of these databases and lead to a reclassification of numerous variants as benign [25]. In this context, it is reassuring to see that all variants reported here have a null or very low frequency in ExAC, which is a strong argument for pathogenicity.

A limitation of this study is the absence of functional assessment of the possibly and probably pathogenic variants, which should help their classification. Moreover, only three genes were analyzed. It is possible that de novo mutations in other genes are also involved in the genetic determinism of sporadic forms. To address this latter issue, the next step is now to perform exome sequencing on negatively screened families and sporadic cases. Indeed, this approach already enabled us to show that (i) rare variations in the *SORL1* gene might be responsible of a subset of AD-EOAD families [43] or at least constitute a penetrant risk factor for familial EOAD [44] and (ii) a set of genes defining an A $\beta$ -centered genetic network are enriched in de novo mutations in sporadic cases [20].

Our findings suggest that a nonnegligible fraction of *PSEN1* mutations occur de novo. The practical implication for clinicians is to highlight the need to systematically include patients with sporadic presentation and very early AOO in genetic screening for the *APP*, *PSEN1*, and *PSEN2* genes. In addition, the need to pursue the effort to classify variants should be emphasized since, based on our results, definite pathogenicity is currently established for only 77% of identified mutations in these genes.

## Supporting information

**S1 Table. Different *PSEN1* ( $n = 78$ ), *PSEN2* ( $n = 4$ ), and *APP* ( $n = 8$ ) mutations identified in the French EOAD whole series, totalizing 188 occurrences. Y = yes.**  
(XLSX)

**S1 Analysis plan. Analysis plan.**  
(DOCX)

## Acknowledgments

The collaborators of the French CNR-MAJ project include Didier Hannequin, Dominique Campion, David Wallon, Olivier Martinaud, Lucie Guyant-Marechal, Annie Laquerriere, Emmanuel Gerardin (Centre Hospitalo Universitaire [CHU], Rouen); Olivier Godefroy, (CHU Amiens); Frederique Etcharry-Bouyx, Valerie Chauvire (CHU Angers); Eric Berger, Eloi Magnin, Ludivine Chamard (CHU Besancon); Sophie Auriacombe, Jean-Francois Dartigues, François Tison (CHU Bordeaux); Vincent de la Sayette, Julien Cogez, Françoise Chapon (CHU Caen); Dominique Castan (CH Castres); Elsa Dionet (CHU Clermont-Ferrand);

Francois Sellal (CH Colmar); Claire Thiriez (CHU Créteil); Olivier Rouaud, Christel Thauvin-Robinet (CHU Dijon); Olivier Moreaud, Mathilde Sauvee (CHU Grenoble); Stephanie Bombois, Adeline Rollin-Sillaire, Marie-Anne Mackowiak, Vincent Deramecourt, Thibaud Lebouvier, Jean-Louis Vincent, Florence Pasquier (CHU Lille); Maité Formaglio, Isabelle Rouillet-Solignac, Alain Vighetto, Nathalie Streichenberger (CHU Lyon); Helene Mollion, Bernard Croisile (CMRR, CHU Lyon); Mira Didic, Olivier Felician, Lejla Koric, Mathieu Ceccaldi, Andre Maues de Paula (CHU Marseille); Audrey Gabelle, Cecilia Marelli, Pierre Labauge (CHU Montpellier); Thérèse Jonveaux (CHU Nancy); Martine Vercelletto, Claire Boutoleau-Bretonniere, Mathieu Sevin (CHU Nantes); Giovanni Castelnovo (CHU Nimes); Hélène-Marie Lanoiselée, Canan Ozsancak, Marie-Hélène Lemaître, Béatrice Laudier, (CH Orleans), Claire Paquet, Julien Dumurgier, Jacques Hugon (CHU Lariboisiere, Paris); Agnes Michon, Isabelle Le Ber, Bruno Dubois, Stephane Epelbaum, Charles Duyckaerts (CHU La Salpetriere, Paris); Marie Sarazin, Carole Roué-Jagot, Julien Lagarde (CHU St Anne, Paris); Foucauld De Boisgheheneuc, Brigitte Gilbert-Dussardier (CHU Poitiers); Serge Belliard (CHU Rennes); Marie Odile Barrellon (CHU Saint-Etienne); Frederic Blanc, Christine Tranchant, Mathieu Anheim, Beatrice Lannes (CHU Strasbourg); Jérémie Pariente, Marie-Bernadette Delisle (CHU Toulouse); and Caroline Hommet and Karl Mondon (CHU Tours).

## Author Contributions

**Data curation:** HML GN ML DC.

**Funding acquisition:** DH DC.

**Investigation:** ARL SR ACR MQM JLV FP ARS OM VS CBB FEB VC MSar ILB SE TJ OR MC OF OG MF BC SA LC MSau CMT AG CO JP CP.

**Methodology:** GN DW ARL DH DC.

**Software:** HML GN DW ML FP ARS OM VS CBB FEB VC MSar ILB SE TJ OR MC OF OG MF BC SA LC MSau CMT AG CO JP CP DH.

**Supervision:** DC.

**Writing – original draft:** HML GN DC.

**Writing – review & editing:** HML GN DW ARL ML SR ACR MQM FP ARS OM VS CBB FEB VC MSar ILB SE TJ OR MC OF OG MF BC SA LC JLV MSau CMT AG CO JP CP DH DC.

## References

1. Champion D, Dumanchin C, Hannequin D, Dubois B, Belliard S, Puel M, et al. Early-onset autosomal dominant Alzheimer disease: prevalence, genetic heterogeneity, and mutation spectrum. *American journal of human genetics*. 1999; 65(3):664–70. <https://doi.org/10.1086/302553> PMID: 10441572
2. Sherrington R, Rogaev EI, Liang Y, Rogaeva EA, Levesque G, Ikeda M, et al. Cloning of a gene bearing missense mutations in early-onset familial Alzheimer's disease. *Nature*. 1995; 375(6534):754–60. <https://doi.org/10.1038/375754a0> PMID: 7596406
3. Levy-Lahad E, Wijsman EM, Nemens E, Anderson L, Goddard KA, Weber JL, et al. A familial Alzheimer's disease locus on chromosome 1. *Science*. 1995; 269(5226):970–3. PMID: 7638621
4. Rogaev EI, Sherrington R, Rogaeva EA, Levesque G, Ikeda M, Liang Y, et al. Familial Alzheimer's disease in kindreds with missense mutations in a gene on chromosome 1 related to the Alzheimer's disease type 3 gene. *Nature*. 1995; 376(6543):775–8. <https://doi.org/10.1038/376775a0> PMID: 7651536
5. Sherrington R, Froelich S, Sorbi S, Champion D, Chi H, Rogaeva EA, et al. Alzheimer's disease associated with mutations in presenilin 2 is rare and variably penetrant. *Human molecular genetics*. 1996; 5(7):985–8. PMID: 8817335

6. Chartier-Harlin MC, Crawford F, Houlden H, Warren A, Hughes D, Fidani L, et al. Early-onset Alzheimer's disease caused by mutations at codon 717 of the beta-amyloid precursor protein gene. *Nature*. 1991; 353(6347):844–6. <https://doi.org/10.1038/353844a0> PMID: 1944558
7. Goate A, Chartier-Harlin MC, Mullan M, Brown J, Crawford F, Fidani L, et al. Segregation of a missense mutation in the amyloid precursor protein gene with familial Alzheimer's disease. *Nature*. 1991; 349(6311):704–6. <https://doi.org/10.1038/349704a0> PMID: 1671712
8. Carter DA, Desmarais E, Bellis M, Campion D, Clerget-Darpoux F, Brice A, et al. More missense in amyloid gene. *Nature genetics*. 1992; 2(4):255–6. <https://doi.org/10.1038/ng1292-255> PMID: 1303275
9. Rovelet-Lecrux A, Hannequin D, Raux G, Le Meur N, Laquerriere A, Vital A, et al. APP locus duplication causes autosomal dominant early-onset Alzheimer disease with cerebral amyloid angiopathy. *Nature genetics*. 2006; 38(1):24–6. <https://doi.org/10.1038/ng1718> PMID: 16369530
10. Haass C, Kaether C, Thinakaran G, Sisodia S. Trafficking and proteolytic processing of APP. *Cold Spring Harbor perspectives in medicine*. 2012; 2(5):a006270. <https://doi.org/10.1101/cshperspect.a006270> PMID: 22553493
11. Campion D, Pottier C, Nicolas G, Le Guennec K, Rovelet-Lecrux A. Alzheimer disease: modeling an Abeta-centered biological network. *Molecular psychiatry*. 2016; 21(7):861–71. <https://doi.org/10.1038/mp.2016.38> PMID: 27021818
12. Guerreiro RJ, Baquero M, Blesa R, Boada M, Bras JM, Bullido MJ, et al. Genetic screening of Alzheimer's disease genes in Iberian and African samples yields novel mutations in presenilins and APP. *Neurobiology of aging*. 2010; 31(5):725–31. <https://doi.org/10.1016/j.neurobiolaging.2008.06.012> PMID: 18667258
13. Moulder KL, Snider BJ, Mills SL, Buckles VD, Santacruz AM, Bateman RJ, et al. Dominantly Inherited Alzheimer Network: facilitating research and clinical trials. *Alzheimer's research & therapy*. 2013; 5(5):48.
14. Wallon D, Rousseau S, Rovelet-Lecrux A, Quillard-Muraine M, Guyant-Marechal L, Martinaud O, et al. The French series of autosomal dominant early onset Alzheimer's disease cases: mutation spectrum and cerebrospinal fluid biomarkers. *Journal of Alzheimer's disease: JAD*. 2012; 30(4):847–56. <https://doi.org/10.3233/JAD-2012-120172> PMID: 22475797
15. Nicolas G, Wallon D, Charbonnier C, Quenez O, Rousseau S, Richard AC, et al. Screening of dementia genes by whole-exome sequencing in early-onset Alzheimer disease: input and lessons. *European journal of human genetics: EJHG*. 2016; 24(5):710–6. <https://doi.org/10.1038/ejhg.2015.173> PMID: 26242991
16. Acuna-Hidalgo R, Veltman JA, Hoischen A. New insights into the generation and role of de novo mutations in health and disease. *Genome biology*. 2016; 17(1):241. <https://doi.org/10.1186/s13059-016-1110-1> PMID: 27894357
17. McKhann GM, Knopman DS, Chertkow H, Hyman BT, Jack CR Jr., Kawas CH, et al. The diagnosis of dementia due to Alzheimer's disease: recommendations from the National Institute on Aging-Alzheimer's Association workgroups on diagnostic guidelines for Alzheimer's disease. *Alzheimer's & dementia: the journal of the Alzheimer's Association*. 2011; 7(3):263–9.
18. Lehmann S, Dumurgier J, Schraen S, Wallon D, Blanc F, Magnin E, et al. A diagnostic scale for Alzheimer's disease based on cerebrospinal fluid biomarker profiles. *Alzheimer's research & therapy*. 2014; 6(3):38.
19. Sellal F, Wallon D, Martinez-Almoyna L, Marelli C, Dhar A, Oesterle H, et al. APP Mutations in Cerebral Amyloid Angiopathy with or without Cortical Calcifications: Report of Three Families and a Literature Review. *Journal of Alzheimer's disease: JAD*. 2017; 56(1):37–46. <https://doi.org/10.3233/JAD-160709> PMID: 27858710
20. Rovelet-Lecrux A, Charbonnier C, Wallon D, Nicolas G, Seaman MN, Pottier C, et al. De novo deleterious genetic variations target a biological network centered on Abeta peptide in early-onset Alzheimer disease. *Molecular psychiatry*. 2015; 20(9):1046–56. <https://doi.org/10.1038/mp.2015.100> PMID: 26194182
21. Raux G, Guyant-Marechal L, Martin C, Bou J, Penet C, Brice A, et al. Molecular diagnosis of autosomal dominant early onset Alzheimer's disease: an update. *Journal of medical genetics*. 2005; 42(10):793–5. <https://doi.org/10.1136/jmg.2005.033456> PMID: 16033913
22. Portet F, Dauvilliers Y, Campion D, Raux G, Hauw JJ, Lyon-Caen O, et al. Very early onset AD with a de novo mutation in the presenilin 1 gene (Met 233 Leu). *Neurology*. 2003; 61(8):1136–7. PMID: 14581682
23. Dumanchin C, Brice A, Campion D, Hannequin D, Martin C, Moreau V, et al. De novo presenilin 1 mutations are rare in clinically sporadic, early onset Alzheimer's disease cases. French Alzheimer's Disease Study Group. *Journal of medical genetics*. 1998; 35(8):672–3. PMID: 9719376



24. Dumanchin C, Tournier I, Martin C, Didic M, Belliard S, Carlander B, et al. Biological effects of four PSEN1 gene mutations causing Alzheimer disease with spastic paraparesis and cotton wool plaques. *Human mutation*. 2006; 27(10):1063.
25. Lek M, Karczewski KJ, Minikel EV, Samocha KE, Banks E, Fennell T, et al. Analysis of protein-coding genetic variation in 60,706 humans. *Nature*. 2016; 536(7616):285–91. <https://doi.org/10.1038/nature19057> PMID: 27535533
26. Ryman DC, Acosta-Baena N, Aisen PS, Bird T, Danek A, Fox NC, et al. Symptom onset in autosomal dominant Alzheimer disease: a systematic review and meta-analysis. *Neurology*. 2014; 83(3):253–60. <https://doi.org/10.1212/WNL.0000000000000596> PMID: 24928124
27. Kumar-Singh S, Theuns J, Van Broeck B, Pirici D, Vennekens K, Corsmit E, et al. Mean age-of-onset of familial Alzheimer disease caused by presenilin mutations correlates with both increased Abeta42 and decreased Abeta40. *Human mutation*. 2006; 27(7):686–95. <https://doi.org/10.1002/humu.20336> PMID: 16752394
28. Kauwe JS, Jacquart S, Chakraverty S, Wang J, Mayo K, Fagan AM, et al. Extreme cerebrospinal fluid amyloid beta levels identify family with late-onset Alzheimer's disease presenilin 1 mutation. *Annals of neurology*. 2007; 61(5):446–53. <https://doi.org/10.1002/ana.21099> PMID: 17366635
29. Cruchaga C, Haller G, Chakraverty S, Mayo K, Vallania FL, Mitra RD, et al. Rare variants in APP, PSEN1 and PSEN2 increase risk for AD in late-onset Alzheimer's disease families. *PLoS ONE*. 2012; 7(2):e31039. <https://doi.org/10.1371/journal.pone.0031039> PMID: 22312439
30. Cruts M, van Duijn CM, Backhovens H, Van den Broeck M, Wehnert A, Serneels S, et al. Estimation of the genetic contribution of presenilin-1 and -2 mutations in a population-based study of presenile Alzheimer disease. *Human molecular genetics*. 1998; 7(1):43–51. PMID: 9384602
31. Finckh U, Muller-Thomsen T, Mann U, Eggers C, Marksteiner J, Meins W, et al. High prevalence of pathogenic mutations in patients with early-onset dementia detected by sequence analyses of four different genes. *American journal of human genetics*. 2000; 66(1):110–7. <https://doi.org/10.1086/302702> PMID: 10631141
32. Sleegers K, Roks G, Theuns J, Aulchenko YS, Rademakers R, Cruts M, et al. Familial clustering and genetic risk for dementia in a genetically isolated Dutch population. *Brain: a journal of neurology*. 2004; 127(Pt 7):1641–9.
33. Brouwers N, Sleegers K, Van Broeckhoven C. Molecular genetics of Alzheimer's disease: an update. *Annals of medicine*. 2008; 40(8):562–83. <https://doi.org/10.1080/07853890802186905> PMID: 18608129
34. To MD, Gokgoz N, Doyle TG, Donoviel DB, Knight JA, Hyslop PS, et al. Functional characterization of novel presenilin-2 variants identified in human breast cancers. *Oncogene*. 2006; 25(25):3557–64. <https://doi.org/10.1038/sj.onc.1209397> PMID: 16474849
35. Armstrong J, Boada M, Rey MJ, Vidal N, Ferrer I. Familial Alzheimer disease associated with A713T mutation in APP. *Neuroscience letters*. 2004; 370(2–3):241–3. <https://doi.org/10.1016/j.neulet.2004.08.026> PMID: 15488330
36. Rossi G, Giaccone G, Maletta R, Morbin M, Capobianco R, Mangieri M, et al. A family with Alzheimer disease and strokes associated with A713T mutation of the APP gene. *Neurology*. 2004; 63(5):910–2. PMID: 15365148
37. Bernardi L, Geracitano S, Colao R, Puccio G, Gallo M, Anfossi M, et al. AbetaAPP A713T mutation in late onset Alzheimer's disease with cerebrovascular lesions. *Journal of Alzheimer's disease: JAD*. 2009; 17(2):383–9. <https://doi.org/10.3233/JAD-2009-1061> PMID: 19363265
38. Conidi ME, Bernardi L, Puccio G, Smirne N, Muraca MG, Curcio SA, et al. Homozygous carriers of APP A713T mutation in an autosomal dominant Alzheimer disease family. *Neurology*. 2015; 84(22):2266–73. <https://doi.org/10.1212/WNL.0000000000001648> PMID: 25948718
39. Barber IS, Garcia-Cardenas JM, Sakdapanichkul C, Deacon C, Zapata Erazo G, Guerreiro R, et al. Screening exons 16 and 17 of the amyloid precursor protein gene in sporadic early-onset Alzheimer's disease. *Neurobiology of aging*. 2016; 39:220 e1–7.
40. Golan MP, Styczynska M, Jozwiak K, Walecki J, Maruszak A, Pniewski J, et al. Early-onset Alzheimer's disease with a de novo mutation in the presenilin 1 gene. *Experimental neurology*. 2007; 208(2):264–8. <https://doi.org/10.1016/j.expneurol.2007.08.016> PMID: 17931627
41. Samocha KE, Robinson EB, Sanders SJ, Stevens C, Sabo A, McGrath LM, et al. A framework for the interpretation of de novo mutation in human disease. *Nature genetics*. 2014; 46(9):944–50. <https://doi.org/10.1038/ng.3050> PMID: 25086666
42. Gabelle A, Dumurgier J, Vercausse O, Paquet C, Bombois S, Laplanche JL, et al. Impact of the 2008–2012 French Alzheimer Plan on the use of cerebrospinal fluid biomarkers in research memory center: the PLM Study. *Journal of Alzheimer's disease: JAD*. 2013; 34(1):297–305. <https://doi.org/10.3233/JAD-121549> PMID: 23186986

43. Pottier C, Hannequin D, Coutant S, Rovelet-Lecrux A, Wallon D, Rousseau S, et al. High frequency of potentially pathogenic SORL1 mutations in autosomal dominant early-onset Alzheimer disease. *Molecular psychiatry*. 2012; 17(9):875–9. <https://doi.org/10.1038/mp.2012.15> PMID: 22472873
44. Nicolas G, Charbonnier C, Wallon D, Quenez O, Bellenguez C, Grenier-Boley B, et al. SORL1 rare variants: a major risk factor for familial early-onset Alzheimer's disease. *Molecular psychiatry*. 2016; 21(6):831–6. <https://doi.org/10.1038/mp.2015.121> PMID: 26303663
